# Supplementary material for: Identification and Empiric Evaluation of New Inhibitors of the Multidrug Transporter P-Glycoprotein (ABCB1)
Source: MDPI journal article supplement (doi:10.3390/ijms24065298), 2023-03-10
Supplement: s1 [file s1]

**Table S1.** Dataset of selective compounds.

| SMILE string of compounds                                                   | ID  | IC <sub>50</sub> μM | Reference |
|-----------------------------------------------------------------------------|-----|---------------------|-----------|
| <chem>O=C(Cc1ccccc1)c1c(OCC(O)C[N+](CCC)cccc1</chem>                        | Q1  | 1.51                | [28]      |
| <chem>O=C(Cc1ccccc1)c1c(OCC(O)C[N+](CC)CC)cccc1</chem>                      | Q2  | 1.7                 | [28]      |
| <chem>O=C(Cc1ccccc1)c1c(OCC(O)C[N+](CCCCC2)cccc1</chem>                     | Q3  | 0.8                 | [28]      |
| <chem>O=C(Cc1ccccc1)c1c(OCC(O)C[N+](C(C)C)C(C)C)cccc1</chem>                | Q4  | 0.65                | [28]      |
| <chem>Fc1ccc(N2CC[N+](CC(O)COc3c(C(=O)CCc4ccccc4)cccc3)CC2)cc1</chem>       | Q5  | 0.27                | [28]      |
| <chem>O=C(Cc1ccccc1)c1c(OCC(O)C[N+](CCCC2)cccc1</chem>                      | Q6  | 3.6                 | [28]      |
| <chem>O=C(Cc1ccccc1)c1c(OCC(O)CN2CCOCC2)cccc1</chem>                        | Q7  | 5.83                | [28]      |
| <chem>O(C(Cc1ccccc1)c1c(OCC(O)C[N+](CCCCC2)cccc1)C</chem>                   | Q8  | 0.53                | [28]      |
| <chem>Fc1ccc(N2CC[N+](CC(O)COc3c(C(OC)CCc4ccccc4)cccc3)CC2)cc1</chem>       | Q9  | 0.09                | [28]      |
| <chem>O(C(Cc1ccccc1)c1c(OCC(O)CN(C(C)C)C(C)C)cccc1)C</chem>                 | Q10 | 0.65                | [28]      |
| <chem>Fc1ccc(N2CC[N+](CC(O)COc3c(C(=O)c4ccccc4)cccc3)CC2)cc1</chem>         | Q11 | 0.79                | [28]      |
| <chem>O(CC(O)C[N+](CCCCC1)c1c(Cc2ccccc2)cccc1</chem>                        | Q12 | 1.56                | [28]      |
| <chem>O=C(C)c1c(OCC(O)C[N+](CCCC(O)(c3ccccc3)CC2)cccc1</chem>               | Q13 | 1.79                | [28]      |
| <chem>O=C(CC)c1c(OCC(O)C[N+](CCCC(O)(c3ccccc3)CC2)cccc1</chem>              | Q14 | 0.68                | [28]      |
| <chem>O=C(c1c(OCC(O)C[N+](CCCC(O)(c3ccccc3)CC2)cccc1)c1ccccc1</chem>        | Q15 | 0.16                | [28]      |
| <chem>O(CC(O)CN(C(C)C)C(C)C)c1c(C(O)CCc2ccccc2)cccc1</chem>                 | Q16 | 3.01                | [28]      |
| <chem>O=C(Nc1c(N)cc(-c2ccccc2)cc1)c1cc(OC)c(OC)c(OC)c1</chem>               | Q17 | 7.2                 | [26]      |
| <chem>Fc1c(NC(=O)c2cc(OC)c(OC)c(OC)c2)ccc(-c2ccccc2)c1</chem>               | Q18 | 1.4                 | [26]      |
| <chem>O=C(Nc1c(NC(=O)c2cc(OC)c(OC)c(OC)c2)ccc(-c2ccccc2)c1)C</chem>         | Q19 | 1.9                 | [26]      |
| <chem>O=[N+](O-)c1c(NC(=O)c2cc(OC)c(OC)c(OC)c2)cc(-c2ccccc2)cc1</chem>      | Q20 | 0.57                | [26]      |
| <chem>O=[N+](O-)c1c(NC(=O)c2cc(OC)c(OC)c(OC)c2)ccc(-c2cc3OCOC3cc2)c1</chem> | Q21 | 0.2                 | [26]      |

|                                                                                       |     |       |      |
|---------------------------------------------------------------------------------------|-----|-------|------|
| <chem>O=[N+](O)c1c(NC(=O)c2cc(OC)c(OC)c(OC)c2)ccc(-c2cc(C(=O)C)ccc2)c1</chem>         | Q22 | 0.6   | [26] |
| <chem>O=[N+](O)c1c(NC(=O)c2cc(OC)c(OC)c(OC)c2)ccc(-c2cc(OC)c(OC)c(OC)c2)c1</chem>     | Q23 | 24.3  | [26] |
| <chem>O=[N+](O)c1cc(-c2ccc(NC(=O)c3cc(OC)c(OC)c(OC)c3)cc2)ccc1</chem>                 | Q24 | 0.4   | [26] |
| <chem>O=[N+](O)c1c(NC(=O)c2cc(OC)c(OC)cc2)ccc(-c2ccccc2)c1</chem>                     | Q25 | 1.3   | [26] |
| <chem>O=[N+](O)c1c(NC(=O)c2cc(OC)cc(OC)c2)ccc(-c2ccccc2)c1</chem>                     | Q26 | 6.6   | [26] |
| <chem>O=[N+](O)c1c(NCc2cc(OC)c(OC)c(OC)c2)ccc(-c2ccccc2)c1</chem>                     | Q27 | 1.5   | [26] |
| <chem>O=[N+](O)c1c(C(=O)Nc2cc(OC)c(OC)c(OC)c2)ccc(-c2ccccc2)c1</chem>                 | Q28 | 2     | [26] |
| <chem>O=[N+](O)c1c(NC(=O)c2cc(OC)c(O)c(O)c2)ccc(-c2cc(O)c(O)cc2)c1</chem>             | Q29 | >100  | [26] |
| <chem>O=[N+](O)c1c(NC(=O)c2cc(OC)c(O)c(O)c2)ccc(-c2cc(OC)c(O)c(O)c2)c1</chem>         | Q30 | 3.1   | [26] |
| <chem>Fc1c(NC(=O)c2cc(OC)c(O)c(O)c2)ccc(-c2ccccc2)c1</chem>                           | Q31 | 14.1  | [26] |
| <chem>O=[N+](O)c1c(NC(=O)c2cc(O)c(OC)cc2)ccc(-c2ccccc2)c1</chem>                      | Q32 | 3.5   | [26] |
| <chem>Fc1c(F)ccc(CCN2CCN(c3nc(CN4CCOCC4)nc4n(C)c5c(c(C(=O)N)ccc5)c34)CC2)c1</chem>    | Q33 | >40   | [27] |
| <chem>N#Cc1c2ncnc(NCCc3ccccc3)c2n2c1CCCC2</chem>                                      | Q34 | 15.85 | [27] |
| <chem>N#Cc1c2ncnc(N(Cc3ccccc3)C)c2n2c1CCCC2</chem>                                    | Q35 | 33.11 | [27] |
| <chem>S(=O)(=O)(Nc1ncnc2c(C#N)c3n(c12)CCCC3)Cc1ccccc1</chem>                          | Q36 | 5.37  | [27] |
| <chem>O(C)c1c(OC)cc2c(c1)C[N+](CCN1C(c3ccc(N(C)C)cc3)=Nc3c(OC)cccc3C1=O)CC2</chem>    | Q37 | 0.05  | [27] |
| <chem>N#Cc1c2ncnc(NCC[N+]3Cc4c(cccc4)CC3)c2n2c1CCCC2</chem>                           | Q38 | >50   | [27] |
| <chem>O=C(Nc1ccc(-c2nc(N3CC[N+](CCc4ccccc4)CC3)c3n4c(c(C#N)c3n2)CCCC4)cc1)C</chem>    | Q39 | 23.44 | [27] |
| <chem>Fc1c(F)ccc(CC[N+]2CCN(c3nc(-c4c(C)cccc4)nc4c(C#N)c5n(c34)CCCC5)CC2)c1</chem>    | Q40 | 17.78 | [27] |
| <chem>O=C1N(CCN2CC[N+](Cc3ccccc3)CC2)C(c2ccc(N(C)C)cc2)=Nc2c1cccc2</chem>             | Q41 | 2.1   | [27] |
| <chem>O(C)c1c(OC)ccc(CCN(CCN2C(c3ccc(N(C)C)cc3)=Nc3c(C2=O)cccc3)C)c1</chem>           | Q42 | 1.9   | [27] |
| <chem>O=C1N(CCN2CCN(c3ncccn3)CC2)C(c2ccc(N(C)C)cc2)=Nc2c1cccc2</chem>                 | Q43 | 0.39  | [27] |
| <chem>O(C)c1c(OC)cc2c(c1)C[N+](CCN1C(c3ccc(N(CC)CC)cc3)=Nc3c(C1=O)cccc3)CC2</chem>    | Q44 | 1.3   | [27] |
| <chem>O(C)c1c(OC)cc2c(c1)C[N+](CCN1C(c3ccc(N(C)C)cc3)=Nc3c(C1=O)ccc(N)c3)CC2</chem>   | Q45 | 7.2   | [27] |
| <chem>O=C(Nc1ccc(CC[N+]2Cc3c(cc(OC)c(OC)c3)CC2)cc1)/C=C/c1cc(OC)c(OC)c(OC)c1</chem>   | Q46 | 0.78  | [24] |
| <chem>O=C(Nc1ccc(CC[N+]2Cc3c(cc(OC)c(OC)c3)CC2)cc1)c1cc(OC)c(OC)c(OC)c1</chem>        | Q47 | 1.04  | [24] |
| <chem>O=C(Nc1ccc(CC[N+]2Cc3c(cc(OC)c(OC)c3)CC2)cc1)c1c2c(cc3c1cccc3)cccc2</chem>      | Q48 | 0.66  | [24] |
| <chem>O=C(Nc1ccc(CC[N+]2Cc3c(cc(OC)c(OC)c3)CC2)cc1)C(c1ccc(OC)cc1)c1ccc(OC)cc1</chem> | Q49 | 0.3   | [24] |
| <chem>O=C(Nc1ccc(CC[N+]2Cc3c(cc(OC)c(OC)c3)CC2)cc1)C1c2c(-c3c1cccc3)cccc2</chem>      | Q50 | 0.7   | [24] |
| <chem>O=C(Nc1ccc(CC[N+]2Cc3c(cc(OC)c(OC)c3)CC2)cc1)C#Cc1cc(OC)c(OC)c(OC)c1</chem>     | Q51 | 0.7   | [24] |

|                                                                                                     |     |      |      |
|-----------------------------------------------------------------------------------------------------|-----|------|------|
| <chem>O=C(Oc1ccc(CC[N+]2Cc3c(cc(OC)c(OC)c3)CC2)cc1)/C=C/c1cc(OC)c(OC)c(OC)c1</chem>                 | Q52 | 1.4  | [24] |
| <chem>O=C(Oc1ccc(CC[N+]2Cc3c(cc(OC)c(OC)c3)CC2)cc1)c1cc(OC)c(OC)c(OC)c1</chem>                      | Q53 | 0.93 | [24] |
| <chem>O=C(Oc1ccc(CC[N+]2Cc3c(cc(OC)c(OC)c3)CC2)cc1)c1c2c(cc3c1cccc3)cccc2</chem>                    | Q54 | 1.23 | [24] |
| <chem>O=C(Oc1ccc(CC[N+]2Cc3c(cc(OC)c(OC)c3)CC2)cc1)C(c1ccc(OC)cc1)c1ccc(OC)cc1</chem>               | Q55 | 0.33 | [24] |
| <chem>O=C(Oc1ccc(CC[N+]2Cc3c(cc(OC)c(OC)c3)CC2)cc1)C1c2c(-c3c1cccc3)cccc2</chem>                    | Q56 | 10   | [24] |
| <chem>O=C(Oc1ccc(CC[N+]2Cc3c(cc(OC)c(OC)c3)CC2)cc1)C#Cc1cc(OC)c(OC)c(OC)c1</chem>                   | Q57 | 2    | [24] |
| <chem>O(C)c1c(OC)cc(/C=C/CNc2ccc(CC[N+]3Cc4c(cc(OC)c(OC)c4)CC3)cc2)cc1OC</chem>                     | Q58 | 0.68 | [24] |
| <chem>O(C)c1c(OC)cc(CNc2ccc(CC[N+]3Cc4c(cc(OC)c(OC)c4)CC3)cc2)cc1OC</chem>                          | Q59 | 0.73 | [24] |
| <chem>O(C)c1c(OC)cc2c(c1)C[N+](CCc1ccc(NCc3c4c(cc5c3cccc5)cccc4)cc1)CC2</chem>                      | Q60 | 1.01 | [24] |
| <chem>O(C)c1c(OC)cc2c(c1)C[N+](CCc1ccc(NCC(c3ccc(OC)cc3)c3ccc(OC)cc3)cc1)CC2</chem>                 | Q61 | 0.57 | [24] |
| <chem>O(C)c1ccc(C=2Oc3c(c(O)cc(O)c3)C(=O)C=2)cc1</chem>                                             | Q62 | >25  | [48] |
| <chem>Clc1c(C(n2cncc2)(c2cccc2)c2cccc2)cccc1</chem>                                                 | Q63 | 24.2 | [48] |
| <chem>Clc1cc2C(N3CC[N+](C)CC3)=Nc3c(Oc2cc1)cccc3</chem>                                             | Q64 | >25  | [48] |
| <chem>Fc1ccc(C(CCCN2CCC(N3C(=O)Nc4c3cccc4)CC2)c2ccc(F)cc2)cc1</chem>                                | Q65 | >25  | [48] |
| <chem>O=C(/C=C/c1cc(OC)c(OC)c(OC)c1)N1C(=O)C=CCC1</chem>                                            | Q66 | >25  | [48] |
| <chem>O=C(OC)c1c(NC(=O)c2nc3c(cc2)cccc3)cc(C(=O)Nc2ccc(CC[N+]3Cc4c(cc(OC)c(OC)c4)CC3)cc2)cc1</chem> | Q67 | >29  | [29] |
| <chem>O=C(OC)c1c(NC(=O)c2nc3c(nc2)cccc3)cc(C(=O)Nc2ccc(CC[N+]3Cc4c(cc(OC)c(OC)c4)CC3)cc2)cc1</chem> | Q68 | >34  | [29] |
| <chem>O=C(OC)c1c(NC(=O)c2ncc(C)nc2)cc(C(=O)Nc2ccc(CC[N+]3Cc4c(cc(OC)c(OC)c4)CC3)cc2)cc1</chem>      | Q69 | >57  | [29] |
| <chem>O=C(OC)c1c(NC(=O)c2nccnc2)cc(C(=O)Nc2ccc(CC[N+]3Cc4c(cc(OC)c(OC)c4)CC3)cc2)cc1</chem>         | Q70 | >20  | [29] |
| <chem>O=C(OC)c1c(NC(=O)c2cnccc2)cc(C(=O)Nc2ccc(CC[N+]3Cc4c(cc(OC)c(OC)c4)CC3)cc2)cc1</chem>         | Q71 | >14  | [29] |
| <chem>O=C(Nc1c(OC)ccc(C(=O)Nc2ccc(CC[N+]3Cc4c(cc(OC)c(OC)c4)CC3)cc2)c1)c1cnc2c(c1)cccc2</chem>      | Q72 | >60  | [29] |
| <chem>O=C(Nc1ccc(CC[N+]2Cc3c(cc(OC)c(OC)c3)CC2)cc1)c1cc(OC)c(OC)c(NC(=O)c2cnc3c(c2)cccc3)c1</chem>  | Q73 | >17  | [29] |
| <chem>O=C(Nc1ccc(CC[N+]2Cc3c(cc(OC)c(OC)c3)CC2)cc1)c1cc(OC)cc(NC(=O)c2cnc3c(c2)cccc3)c1</chem>      | Q74 | >15  | [29] |
| <chem>O=C(Nc1c(C)ccc(C(=O)Nc2ccc(CC[N+]3Cc4c(cc(OC)c(OC)c4)CC3)cc2)c1)c1cnc2c(c1)cccc2</chem>       | Q75 | >15  | [29] |
| <chem>Fc1cc(F)cc(-c2cc([N+](=O)[O-])c(NC(=O)c3cc(OC)c(OC)c(OC)c3)cc2)c1</chem>                      | Q76 | 2.6  | [26] |
| <chem>Clc1c2C(=O)N(CC[N+]3Cc4c(cc(OC)c(OC)c4)CC3)C(c3ccc(N(C)C)cc3)=Nc2ccc1</chem>                  | Q77 | 0.16 | [27] |
| <chem>O=[N+](O)c1cc2C(=O)N(CC[N+]3Cc4c(cc(OC)c(OC)c4)CC3)C(c3ccc(N(C)C)cc3)=Nc2cc1</chem>           | Q78 | 0.6  | [27] |
| <chem>O(C)c1c(OC)cc2c(c1)C[N+](CCN1C(c3ccc(N(C)C)cc3)=Nc3c(C)cccc3C1=O)CC2</chem>                   | Q79 | 0.63 | [27] |
| <chem>O(C)c1c(OC)cc2c(c1)C[N+](CCN1C(c3cc(CC)ccc3)=Nc3c(C1=O)cccc3)CC2</chem>                       | Q80 | 0.8  | [27] |
| <chem>O(C)c1c(OC)cc2c(c1)C[N+](CCN1C(c3cc4c(cc3)cccc4)=Nc3c(C1=O)cccc3)CC2</chem>                   | Q81 | 0.85 | [27] |

|                                                                                            |     |      |      |
|--------------------------------------------------------------------------------------------|-----|------|------|
| <chem>O(C)c1c(OC)cc2c(c1)C[N+](CCN1C(c3ccc(C(C)C)cc3)=Nc3c(C1=O)cccc3)CC2</chem>           | Q82 | 1    | [27] |
| <chem>O(C)c1c(OC)cc2c(c1)C[N+](CCN1C(c3ccc(-c4cccc4)cc3)=Nc3c(C1=O)cccc3)CC2</chem>        | Q83 | 1.03 | [27] |
| <chem>Clc1c2N=C(N(CC[N+]3Cc4c(cc(OC)c(OC)c4)CC3)C(=O)c2ccc1)c1ccc(N(C)C)cc1</chem>         | Q84 | 1.06 | [27] |
| <chem>O(C)c1c(OC)cc2c(c1)C[N+](CCN1C(c3ccc(N(C)C)cc3)=Nc3c(C1=O)cccc3)CC2</chem>           | Q85 | 1.07 | [27] |
| <chem>O=[N+][O-]c1cc2N=C(N(CC[N+]3Cc4c(cc(OC)c(OC)c4)CC3)C(=O)c2cc1)c1ccc(N(C)C)cc1</chem> | Q86 | 1.1  | [27] |
| <chem>Fc1c(F)ccc(CC[N+]2CCN(c3nc(-c4ccncc4)nc4n5c(c(C#N)c34)CCCC5)CC2)c1</chem>            | Q87 | 1.35 | [27] |
| <chem>Clc1cc2N=C(N(CC[N+]3Cc4c(cc(OC)c(OC)c4)CC3)C(=O)c2cc1)c1ccc(N(C)C)cc1</chem>         | Q88 | 1.35 | [27] |
| <chem>O(C)c1c(OC)cc2c(c1)C[N+](CCN1C(c3cc(N(C)C)ccc3)=Nc3c(C1=O)cccc3)CC2</chem>           | Q89 | 1.6  | [27] |
| <chem>Clc1cc2C(=O)N(CC[N+]3Cc4c(cc(OC)c(OC)c4)CC3)C(c3ccc(N(C)C)cc3)=Nc2cc1</chem>         | Q90 | 1.7  | [27] |
| <chem>S(=O)(=O)(N1CCCC1)c1cc2c3c(N4CC[N+](CCc5cc(F)c(F)cc5)CC4)ncnc3[nH]c2cc1</chem>       | Q91 | 3.32 | [27] |
| <chem>Fc1c(F)ccc(CC[N+]2CCN(c3ncnc4n5c(c(C(=O)NCc6ncccc6)c34)CCCC5)CC2)c1</chem>           | Q92 | 3.39 | [27] |
| <chem>O(C)c1c(OC)cc2c(c1)C[N+](CCN1C(c3cc4OCOc4cc3)=Nc3c(C1=O)cccc3)CC2</chem>             | Q93 | 3.7  | [27] |
| <chem>O(C)c1c(OC)cc2c(c1)C[N+](CCN1C(c3ccc(N(C)C)cc3)=Nc3c(C1=O)cc(N)cc3)CC2</chem>        | Q94 | 2    | [27] |
| <chem>O=C(CCc1cccc1)c1c(OCC(O)CNc2cccc2)cccc1</chem>                                       | Q95 | 5.5  | [28] |
| <chem>O(C)c1c(OC)cc2c(c1)C[N+](CCN1C(c3ccccc3)=Nc3c(C1=O)cccc3)CC2</chem>                  | Q96 | 8    | [27] |
| <chem>O=C(OC)c1ccc(NCC(O)COc2c(C(=O)CCc3cccc3)cccc2)cc1</chem>                             | Q97 | 9.61 | [28] |
| <chem>Brc1ccc(NC(=O)c2cc(OC)c(OC)c(OC)c2)cc1</chem>                                        | Q98 | 20   | [26] |
| <chem>O=C(CC)c1c(OCC(O)C[N+]2CCOCC2)cccc1</chem>                                           | Q99 | 113  | [28] |
